# Supplementary material for: A point-of-care microfluidic biosensing system for rapid and ultrasensitive nucleic acid detection from clinical samples
Source: Royal Society of Chemistry journal article supplement (doi:10.1039/d3lc00372h), 2023-01-01
Supplement: d3lc00372h1.pdf [file d3lc00372h1.pdf]

## Supplementary Information

### **A point-of-care microfluidic biosensing system for rapid and ultrasensitive nucleic acid detection from clinical samples**

Yuxuan Zhang<sup>1,2†</sup>, Yang Song<sup>1,2†</sup>, Zhengyan Weng<sup>1,2</sup>, Jie Yang<sup>3,#</sup>, Lori Avery<sup>4</sup>, Kevin D.  
Dieckhaus<sup>5</sup>, Rebecca Y. Lai<sup>6</sup>, Xue Gao<sup>3,7,8</sup>, Yi Zhang<sup>1,2\*</sup>

#### **Affiliations**

<sup>1</sup> Department of Biomedical Engineering, University of Connecticut, Storrs, CT 06269, USA.

<sup>2</sup> Institute of Materials Science, University of Connecticut, Storrs, CT 06269, USA.

<sup>3</sup> Department of Chemical and Biomolecular Engineering, Rice University, Houston, TX 77005,  
USA.

<sup>4</sup> Department of Pathology and Laboratory Medicine, UConn Health, Farmington, CT 06030, USA

<sup>5</sup> Division of Infectious Diseases, Department of Medicine, UConn Health, Farmington, CT 06030,  
USA

<sup>6</sup> Department of Chemistry, University of Nebraska-Lincoln, Lincoln, NE 68588, USA.

<sup>7</sup> Department of Bioengineering, Rice University, Houston, TX 77005, USA.

<sup>8</sup> Department of Chemistry, Rice University, Houston, TX 77005, USA.

# Current address: Department of Biochemistry and Molecular Biology, School of Basic Medical  
Sciences, Tianjin Medical University, Tianjin, 300070 China.

† These authors contributed equally to this work.

\* Corresponding author. Email: yi.5.zhang@uconn.edu (Y.Z.)

**Table S1. Estimated cost for the point-of-care device.**

| <b>Disposable Part</b>     | <b>Cost (\$/chip)</b> |
|----------------------------|-----------------------|
| Microfluidics              | 0.4                   |
| Microheater                | 0.4                   |
| Screen-printed electrode   | 4.5                   |
| QuickExtract™ lysis buffer | 1                     |
| RNA reporter               | 3.5                   |
| CRISPR assay               | ~3                    |
| <b>In total</b>            | <b>~12.8</b>          |

| <b>Reusable Part</b> | <b>Cost (\$/EA)</b> |
|----------------------|---------------------|
| Battery box          | 1.2                 |
| Battery              | 1                   |
| <b>In total</b>      | <b>2.2</b>          |

**Table S2. RNA oligo sequences used in this study.**

| <b>Sequence name</b> | <b>Sequence (5' → 3')</b>                                                                                             | <b>Related figures</b>                              |
|----------------------|-----------------------------------------------------------------------------------------------------------------------|-----------------------------------------------------|
| <b>Target RNA</b>    | GUCUGAUAAUGGACCCCAAAAUCAGCGAAAUG<br>CACCCCGCAUUACGUUUGGUGGACCCUCAGAU<br>UCAACUGGCAGUAACCAGAAUGGAGAACGCAG<br>UGGGGCGCG | Figure 3, Figure 4, Figure 5                        |
| <b>crRNA</b>         | GACUACCCCAAAAACGAAGGGGACUAAAACAA<br>UCUGAGGGUCCACCAAACGUAAUGCG                                                        | Figure 3, Figure 4, Figure 5                        |
| <b>Reporter RNA</b>  | /5ThioMC6-<br>D/UUUUUUUUUUUUUUUUUUUUU/3MeBIN/                                                                         | IDT: Figure 3 and Figure 4<br>GeneLink:<br>Figure 5 |
| <b>RSV</b>           | UGGGGCAAUAUGGAAACAUAACGUGAACAAAC<br>UUCACGAAGGCUCCACAUAACACAGCUGCUGUU<br>CAAUACAAUGUCUUAGAAAAAGACGAUGACCC<br>UGCA     | Figure 3D                                           |
| <b>INV A</b>         | CAAUCUUGUCACCUCUGACUAAGGGAAUUUUA<br>GGAUUUGUGUUCACGCUCACCGUGCCCAGUGA<br>GCGAGGACUGCAGCGUAGACGCUUUAUCCAAA<br>AUGC      | Figure 3D                                           |
| <b>INV B</b>         | UCAACUCACUCUUCGAGCGUCUCAAUGAAGGA<br>CAUUCAAAGCCAAUUCGAGCAGCUGAACUGC<br>GGUGGGAGUCUUAUCCCAAUUUGGUCAAGAGC<br>ACCG       | Figure 3D                                           |

/5ThioMC6-D/: Thiol Modifier C6 S-S modification

/3MeBIN/: 3' Methylene blue

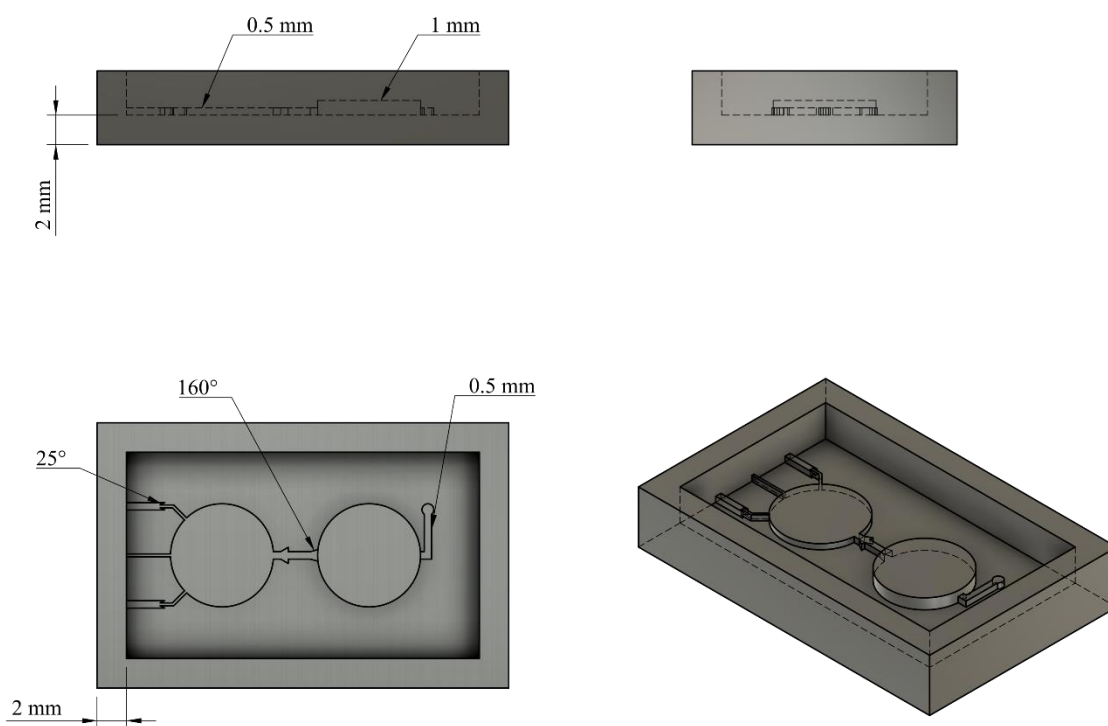

**Figure S1.** The 3D mold for making microfluidic devices. The 3D model was created using Autodesk Fusion 360 (Autodesk, Inc. CA, USA) and later manufactured by a form2 3D printer.

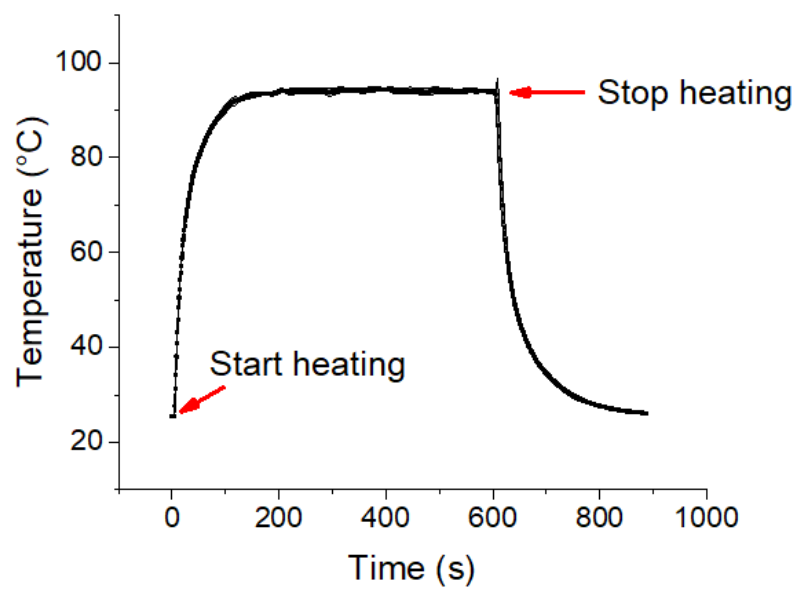

**Figure S2.** The real-time temperature in the thermal lysis reservoir. The power was turned off 10 minutes after the activation of the heater.
